# Supplementary material for: Near-surface structure of the North Anatolian Fault zone from Rayleigh and Love wave tomography using ambient seismic noise
Source: Copernicus journal article supplement (doi:10.5194/se-10-363-2019), 2019-03-06
Supplement: Supplementary file 2 [file se-10-363-2019-supplement.zip]

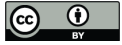

## *Supplement of*

# **Near-surface structure of the North Anatolian Fault zone from Rayleigh and Love wave tomography using ambient seismic noise**

**George Taylor et al.**

*Correspondence to:* George Taylor ([george.taylor@helsinki.fi](mailto:george.taylor@helsinki.fi))

- [se-10-363-2019-supplement-title-page.pdf](#)
- [final\\_s\\_wave\\_model.dat](#)
- [supplementary\\_material.pdf](#)

The copyright of individual parts of the supplement might differ from the CC BY 4.0 License.
